# Supplementary material for: Prognostic models versus single risk factor approach in first‐trimester selective screening for gestational diabetes mellitus: a prospective population‐based multicentre cohort study
Source: PubMed Central journal article supplement (PMC7891327; doi:10.1111/1471-0528.16446), 2020-09-01
Supplement: BJO-128-645-s001.pdf [file BJO-128-645-s001.pdf]

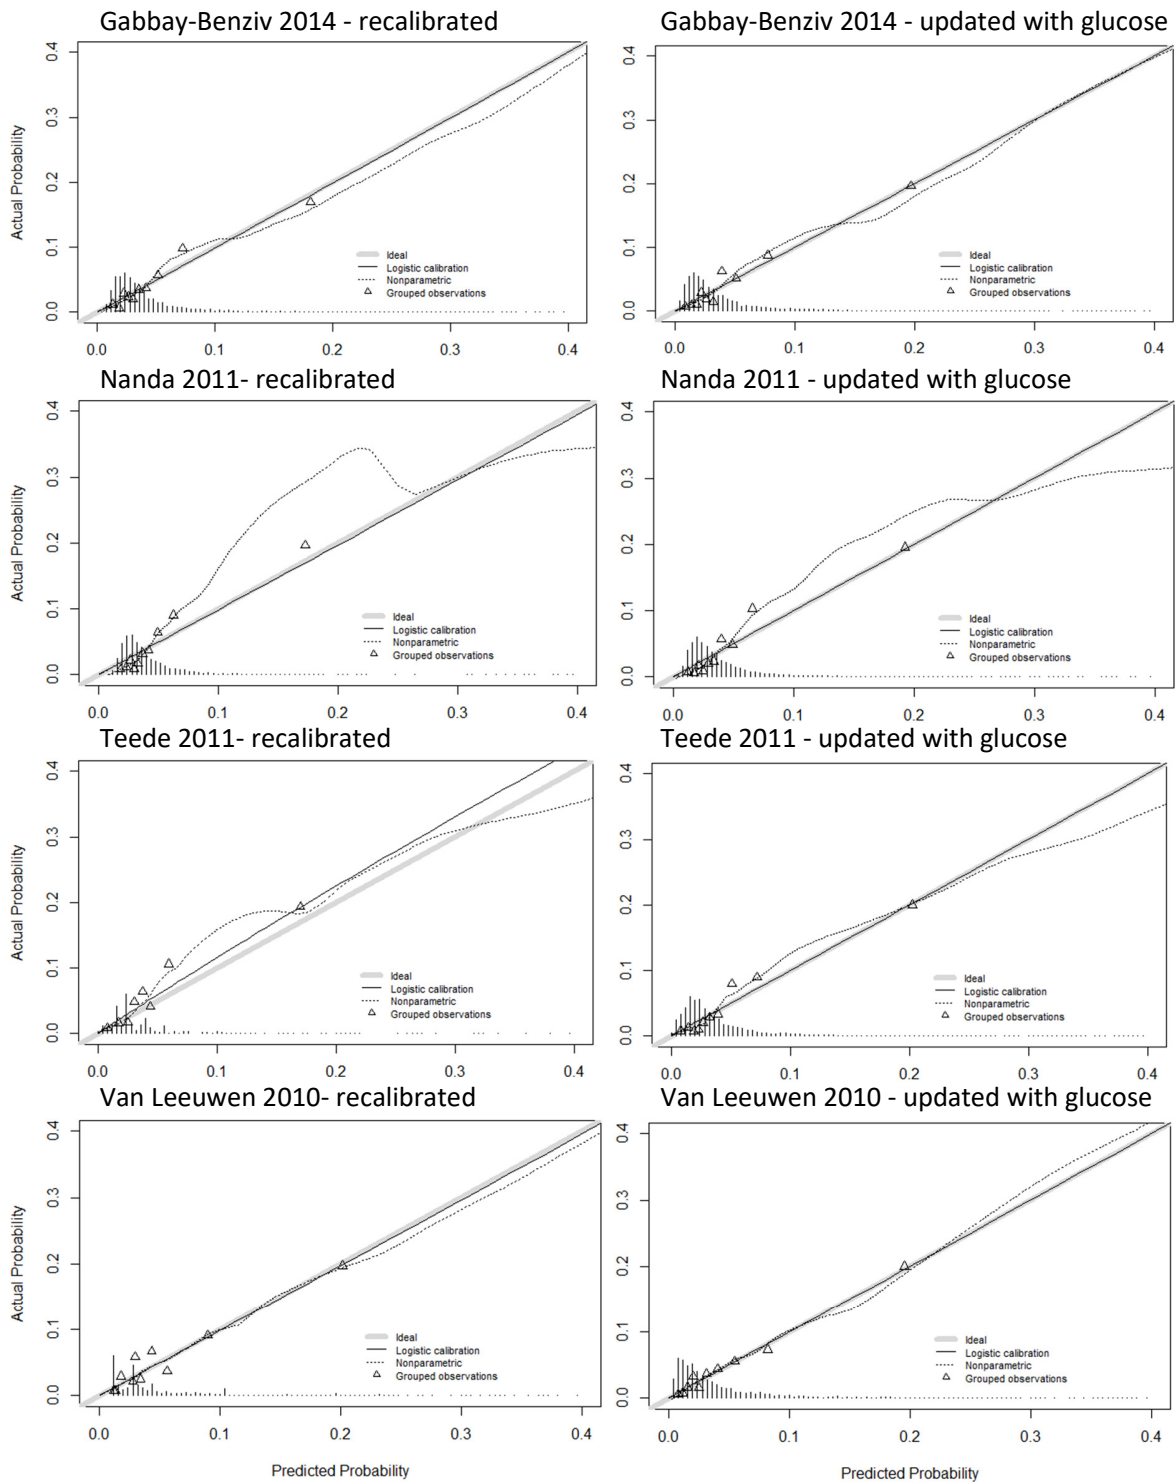

**Figure S1.** Calibration plots of the four first trimester prognostic models for GDM before and after the addition of the new predictor glucose.
