# Supplementary material for: Prognostic models versus single risk factor approach in first‐trimester selective screening for gestational diabetes mellitus: a prospective population‐based multicentre cohort study
Source: PubMed Central journal article supplement (PMC7891327; doi:10.1111/1471-0528.16446), 2020-09-01
Supplement: BJO-128-645-s002.pdf [file BJO-128-645-s002.pdf]

**Table S1.** Full equations of the original, recalibrated, and updated models. The probability of developing gestational diabetes was calculated using logistic regression. The probability of GDM =  $e^X/(1+e^X)$  where X is the linear predictor.

| Name                                | Original model                                                                                                                                                                                                                                                                                                                                                                                                                                                                                                                                                                | Recalibrated model                                                   | Updated model                                                                               |
|-------------------------------------|-------------------------------------------------------------------------------------------------------------------------------------------------------------------------------------------------------------------------------------------------------------------------------------------------------------------------------------------------------------------------------------------------------------------------------------------------------------------------------------------------------------------------------------------------------------------------------|----------------------------------------------------------------------|---------------------------------------------------------------------------------------------|
| Reference<br>2010 <sup>20</sup>     | $X_{\text{original}}$ = presence of at least one of the following factors <sup>a</sup> : <ul style="list-style-type: none"> <li>▪ history of GDM</li> <li>▪ BMI &gt; 30 (kg/m<sup>2</sup>) at first perinatal control</li> <li>▪ history of macrosomia (&gt;4500g)</li> <li>▪ first degree family member with diabetes</li> <li>▪ high risk ethnicities (Southern Asians, Hindu, Afro-Caribbean, or from the Middle East, Morocco, or Egypt)</li> </ul>                                                                                                                       | NA                                                                   | NA                                                                                          |
| Gabbay-Benziv<br>2014 <sup>16</sup> | $X_{\text{original}}$ = -11.569 + 0.064 (age, yrs) + 0 (if white race) + 2.026 (if Asian race) + 0.083 (if African race) + 1.661 (if other nonwhite race) + 2.144 (history of GDM) + 0.034 (systolic blood pressure, mmHg) + 0.082 (BMI, kg/m <sup>2</sup> )                                                                                                                                                                                                                                                                                                                  | $X_{\text{recalibrated}}$ = -0.209 + 0.867 ( $X_{\text{original}}$ ) | $X_{\text{glucose added}}$ = 0.004 + 0.054 ( $X_{\text{original}}$ ) + 0.152 (ln(glucose))  |
| Nanda<br>2011 <sup>17</sup>         | $X_{\text{original}}$ = $\alpha$ + 0.058 (age, yrs) + 0.113 (BMI, kg/m <sup>2</sup> ) + 0 (if Caucasian ethnicity) + 0.888 (if Asian ethnicity) + 0 (nulliparous) + 3.723 (if parous with previous GDM) + 0.67 (parous with previous LGA above 90th percentile)                                                                                                                                                                                                                                                                                                               | $X_{\text{recalibrated}}$ = -7.071 + 0.824 ( $X_{\text{original}}$ ) | $X_{\text{glucose added}}$ = -0.500 + 0.071 ( $X_{\text{original}}$ ) + 0.139 (ln(glucose)) |
| Teede<br>2010 <sup>18</sup>         | $X_{\text{original}}$ = $\alpha$ + 0 (if age <25 yrs) + 0.92 (if age 25-29 yrs) + 1.22 (if age 30-34 yrs) + 1.69 (if age 35-39 yrs) + 1.95 (if age ≥40 yrs) + 0 (if BMI <20 kg/m <sup>2</sup> ) + 0.53 (if BMI 20.0-24.9 kg/m <sup>2</sup> ) + 0.69 (if BMI 25.0-26.9 kg/m <sup>2</sup> ) + 0.83 (if BMI 27.0-29.9 kg/m <sup>2</sup> ) + 1.28 (if BMI 30.0-34.9 kg/m <sup>2</sup> ) + 1.82 (if BMI ≥35.0 kg/m <sup>2</sup> ) + 1.31 (if Asian race) + 0.06 (if African race) + 0.37 (if other race) + 0.53 (if family history of DM, first degree) + 2.39 (if history of GDM) | $X_{\text{recalibrated}}$ = -5.606 + 1.132 ( $X_{\text{original}}$ ) | $X_{\text{glucose added}}$ = -0.319 + 0.071 ( $X_{\text{original}}$ ) + 0.152 (ln(glucose)) |
| van Leeuwen<br>2010 <sup>19</sup>   | $X_{\text{original}}$ = -6.1 + 0.83 (if non-Caucasian race) + 0.57 (if first degree family history of DM) – 0.67 (if parous without history of GDM) + 0.5 (if parous with history of GDM) + 0.13 (BMI in kg/m <sup>2</sup> with BMI <22 transformed to 22, if >30 transformed to 30)                                                                                                                                                                                                                                                                                          | $X_{\text{recalibrated}}$ = 0.752 + 1.314 ( $X_{\text{original}}$ )  | $X_{\text{glucose added}}$ = 0.019 + 0.070 ( $X_{\text{original}}$ ) + 0.160 (ln(glucose))  |

<sup>a</sup> Current practice also classifies women with a history of unexplained IUFD or PCOS as high-risk, but these predictors were not available in the cohort. *IUFD*, intra uterine fetal demise. *yrs*, years. *BMI*, body mass index. *DM*, diabetes mellitus. *LGA*, large-for-gestational-age. *kg*, kilograms. *m<sup>2</sup>*, squared meters. *GDM*, gestational diabetes mellitus. *glucose*, first trimester random venous glucose. *gr*, grams. *IVF*, in vitro fertilization.
