# Supplementary material for: Prognostic models versus single risk factor approach in first‐trimester selective screening for gestational diabetes mellitus: a prospective population‐based multicentre cohort study
Source: PubMed Central journal article supplement (PMC7891327; doi:10.1111/1471-0528.16446), 2020-09-01
Supplement: BJO-128-645-s003.pdf [file BJO-128-645-s003.pdf]

**Table S2.** Baseline characteristics of patients in the RESPECT cohort, stratified by variables that were available for imputation

| Characteristic                             | Patients with missing information | Complete cases (n=2603) | Patients with at least one missing value (n=1120) | P       | Overall RESPECT cohort (n=3723)* |
|--------------------------------------------|-----------------------------------|-------------------------|---------------------------------------------------|---------|----------------------------------|
| Age (years)                                | 168 (4.5)                         | 30.9 (4.34)†            | 30.7 (3.91)†                                      | 0.29    | 30.8 (4.2)†                      |
| Body mass index, before pregnancy          | 46 (1.2)                          | 23.3 (21.2-26.3)†       | 23.0 (20.9-25.9)†                                 | 0.01‡   | 23.2 (21.1-26.2)†                |
| Body mass index                            | 182 (4.8)                         | 23.8 (21.6-26.9)†       | 23.4 (21.3-26.3)†                                 | 0.01‡   | 23.7 (21.5-26.7)†                |
| Systolic blood pressure (mm Hg)            | 65 (1.7)                          | 114 (12)†               | 115 (12)†                                         | 0.48    | 115 (12)†                        |
| Diastolic blood pressure (mm Hg)           | 64 (1.7)                          | 67 (8)†                 | 67 (8)†                                           | 0.09    | 67 (8)†                          |
| Glucose (mmol/L)                           | 171 (4.5)                         | 4.7 (4.3-5.1)†          | 4.7 (4.4-5.1)†                                    | 0.34    | 4.7 (4.4-5.1)†                   |
| Ethnicity                                  |                                   |                         |                                                   |         |                                  |
| White                                      |                                   | 1665 (89.0)             | 1066 (95.2)                                       |         | 3387 (91.0)                      |
| African                                    |                                   | 17 (0.9)                | 2 (0.2)                                           |         | 30 (0.8)                         |
| Asian                                      | 732 (19.7)                        | 30 (1.6)                | 11 (1.0)                                          | <0.001‡ | 53 (1.4)                         |
| Mixed                                      |                                   | 44 (2.4)                | 15 (1.3)                                          |         | 77 (2.1)                         |
| Other                                      |                                   | 115 (4.4)               | 26 (2.3)                                          |         | 176 (4.7)                        |
| Education                                  |                                   |                         |                                                   |         |                                  |
| Low                                        |                                   | 198 (7.6)               | 52 (4.6)                                          |         | 270 (7.3)                        |
| Middle                                     | 223 (6.0)                         | 825 (31.7)              | 362 (32.3)                                        | 0.004‡  | 1273 (34.29)                     |
| High                                       |                                   | 1357 (57.0)             | 706 (63.0)                                        |         | 2180 (58.6)                      |
| Smoking during pregnancy                   | 0                                 | 258 (9.9)               | 73 (6.5)                                          | 0.001‡  | 334 (9.0)                        |
| History of chronic hypertension            | 1 (0.0)                           | 43 (1.7)                | 14 (1.2)                                          | 0.44    | 57 (1.5)                         |
| Family history of diabetes mellitus        | 1 (0.0)                           | 389 (15.0)              | 154 (13.8)                                        | 0.37    | 543 (14.6)                       |
| Method of conception                       |                                   |                         |                                                   |         |                                  |
| Spontaneous                                |                                   | 2396 (93.1)             | 1033 (92.2)                                       |         | 3429 (92.9)                      |
| Ovulation drugs                            | 30 (0.8)                          | 61 (2.4)                | 38 (3.4)                                          | 0.20    | 99 (2.7)                         |
| In vitro fertilisation                     |                                   | 82 (3.2)                | 28 (2.5)                                          |         | 110 (3.0)                        |
| Nulliparous                                | 4 (0.0)                           | 1143 (44.0)             | 509 (45.4)                                        | 0.43    | 1655 (44.5)                      |
| History of gestational diabetes mellitus   | 0                                 | 47 (1.8)                | 12 (1.1)                                          | 0.13    | 59 (1.6)                         |
| History of macrosomia (>90th percentile)   | 0                                 | 146 (5.6)               | 84 (7.5)                                          | 0.03‡   | 230 (6.2)                        |
| Recurrent miscarriages (≥2)                | 4 (0.0)                           | 173 (6.7)               | 59 (5.3)                                          | 0.13    | 232 (6.2)                        |
| History of fetal death                     | 0                                 | 58 (2.2)                | 16 (1.4)                                          | 0.14    | 74 (2.0)                         |
| Gestational diabetes mellitus in pregnancy |                                   | 116 (5.0)               | 53 (4.7)                                          | 0.84    | 181 (4.9)                        |
| Insulin dependent                          | 263 (7.0)                         | 20 (0.8)                | 13 (1.2)                                          | 0.33    | 33 (0.9)                         |
| Gestational age at delivery (days)         | 342 (9.2)                         | 280 (273-285)†          | 280 (274-286)†                                    | 0.36    | 280 (273-285)†                   |
| Sex (male)                                 | 358 (9.6)                         | 1154 (50.7)             | 569 (52.3)                                        | 0.40    | 1902 (51.1)                      |
| Birthweight (g)                            |                                   | 3504 (3200-3860)†       | 3540 (3216-3880)†                                 | 0.13    | 3520 (3190-3880)†                |
| Percentile                                 | 372 (10.0)                        | 55 (30-77)†             | 57 (32-80)†                                       | 0.07    | 55 (30-79)†                      |
| >90th percentile                           |                                   | 256 (12.0)              | 140 (13.2)                                        | 0.37    | 494 (13.3)                       |

Data are no (%) unless stated otherwise. \*Data in column includes imputed data for those with missing values. †Data are mean (standard deviation) or median (interquartile range). ‡Significant at the P<0.05 level. Adopted from the external validation study previously published by our group (Lamain-de Ruiter M et al. *BMJ*. 2016;354:i4338).
