# Supplementary material for: Prognostic models versus single risk factor approach in first‐trimester selective screening for gestational diabetes mellitus: a prospective population‐based multicentre cohort study
Source: PubMed Central journal article supplement (PMC7891327; doi:10.1111/1471-0528.16446), 2020-09-01
Supplement: BJO-128-645-s004.pdf [file BJO-128-645-s004.pdf]

**Table S3.** Updated prognostic models compared to the reference method in two scenarios

|                                  | Scenario A <sup>a</sup> |                 | Scenario B <sup>b</sup> |                 |
|----------------------------------|-------------------------|-----------------|-------------------------|-----------------|
|                                  | sensitivity (%)         | specificity (%) | high-risk (%)           | specificity (%) |
| <i>Reference</i> <sup>20</sup>   | 71                      | 73              | 29                      | 73              |
| Gabbay-Benziv 2014 <sup>16</sup> | 69                      | 73              | 31                      | 71              |
| Nanda 2011 <sup>17</sup>         | 71                      | 73              | 29                      | 73              |
| Teede 2011 <sup>18</sup>         | 74                      | 73              | 27                      | 75              |
| van Leeuwen 2010 <sup>19</sup>   | 68                      | 73              | 33                      | 69              |

<sup>a</sup> Scenario A: model sensitivity and specificity were calculated when the proportion of women considered high-risk was held constant at 29% (i.e. the proportion of women classified high-risk by the reference method).

<sup>b</sup> Scenario B: the proportion of women classified high-risk by the model and specificity were calculated when the sensitivity was held constant at 71% (i.e. the sensitivity of the reference method).
